# Supplementary material
Source: bioRxiv or medRxiv preprint supplement (https://www.biorxiv.org/highwire/filestream/97579/field_highwire_adjunct_files/3/317503-4.pdf)
Supplement: Supplementary file [file 317503-4.pdf]

**Batiuk, Martirosyan et al. Supplementary File 2.**

Transcript count table. Counts from 49,568 genes and 92 ERCC spike-in controls across 2,031 high quality cells that passed quality control.

This data will be deposited in bioRxiv upon manuscript publication.
